# Supplementary material
Source: Research Square preprint supplement (doi:10.21203/rs.3.rs-9739906/v1)

Supplementary Table 1. Pearson correlation matrix for all match contextual variables

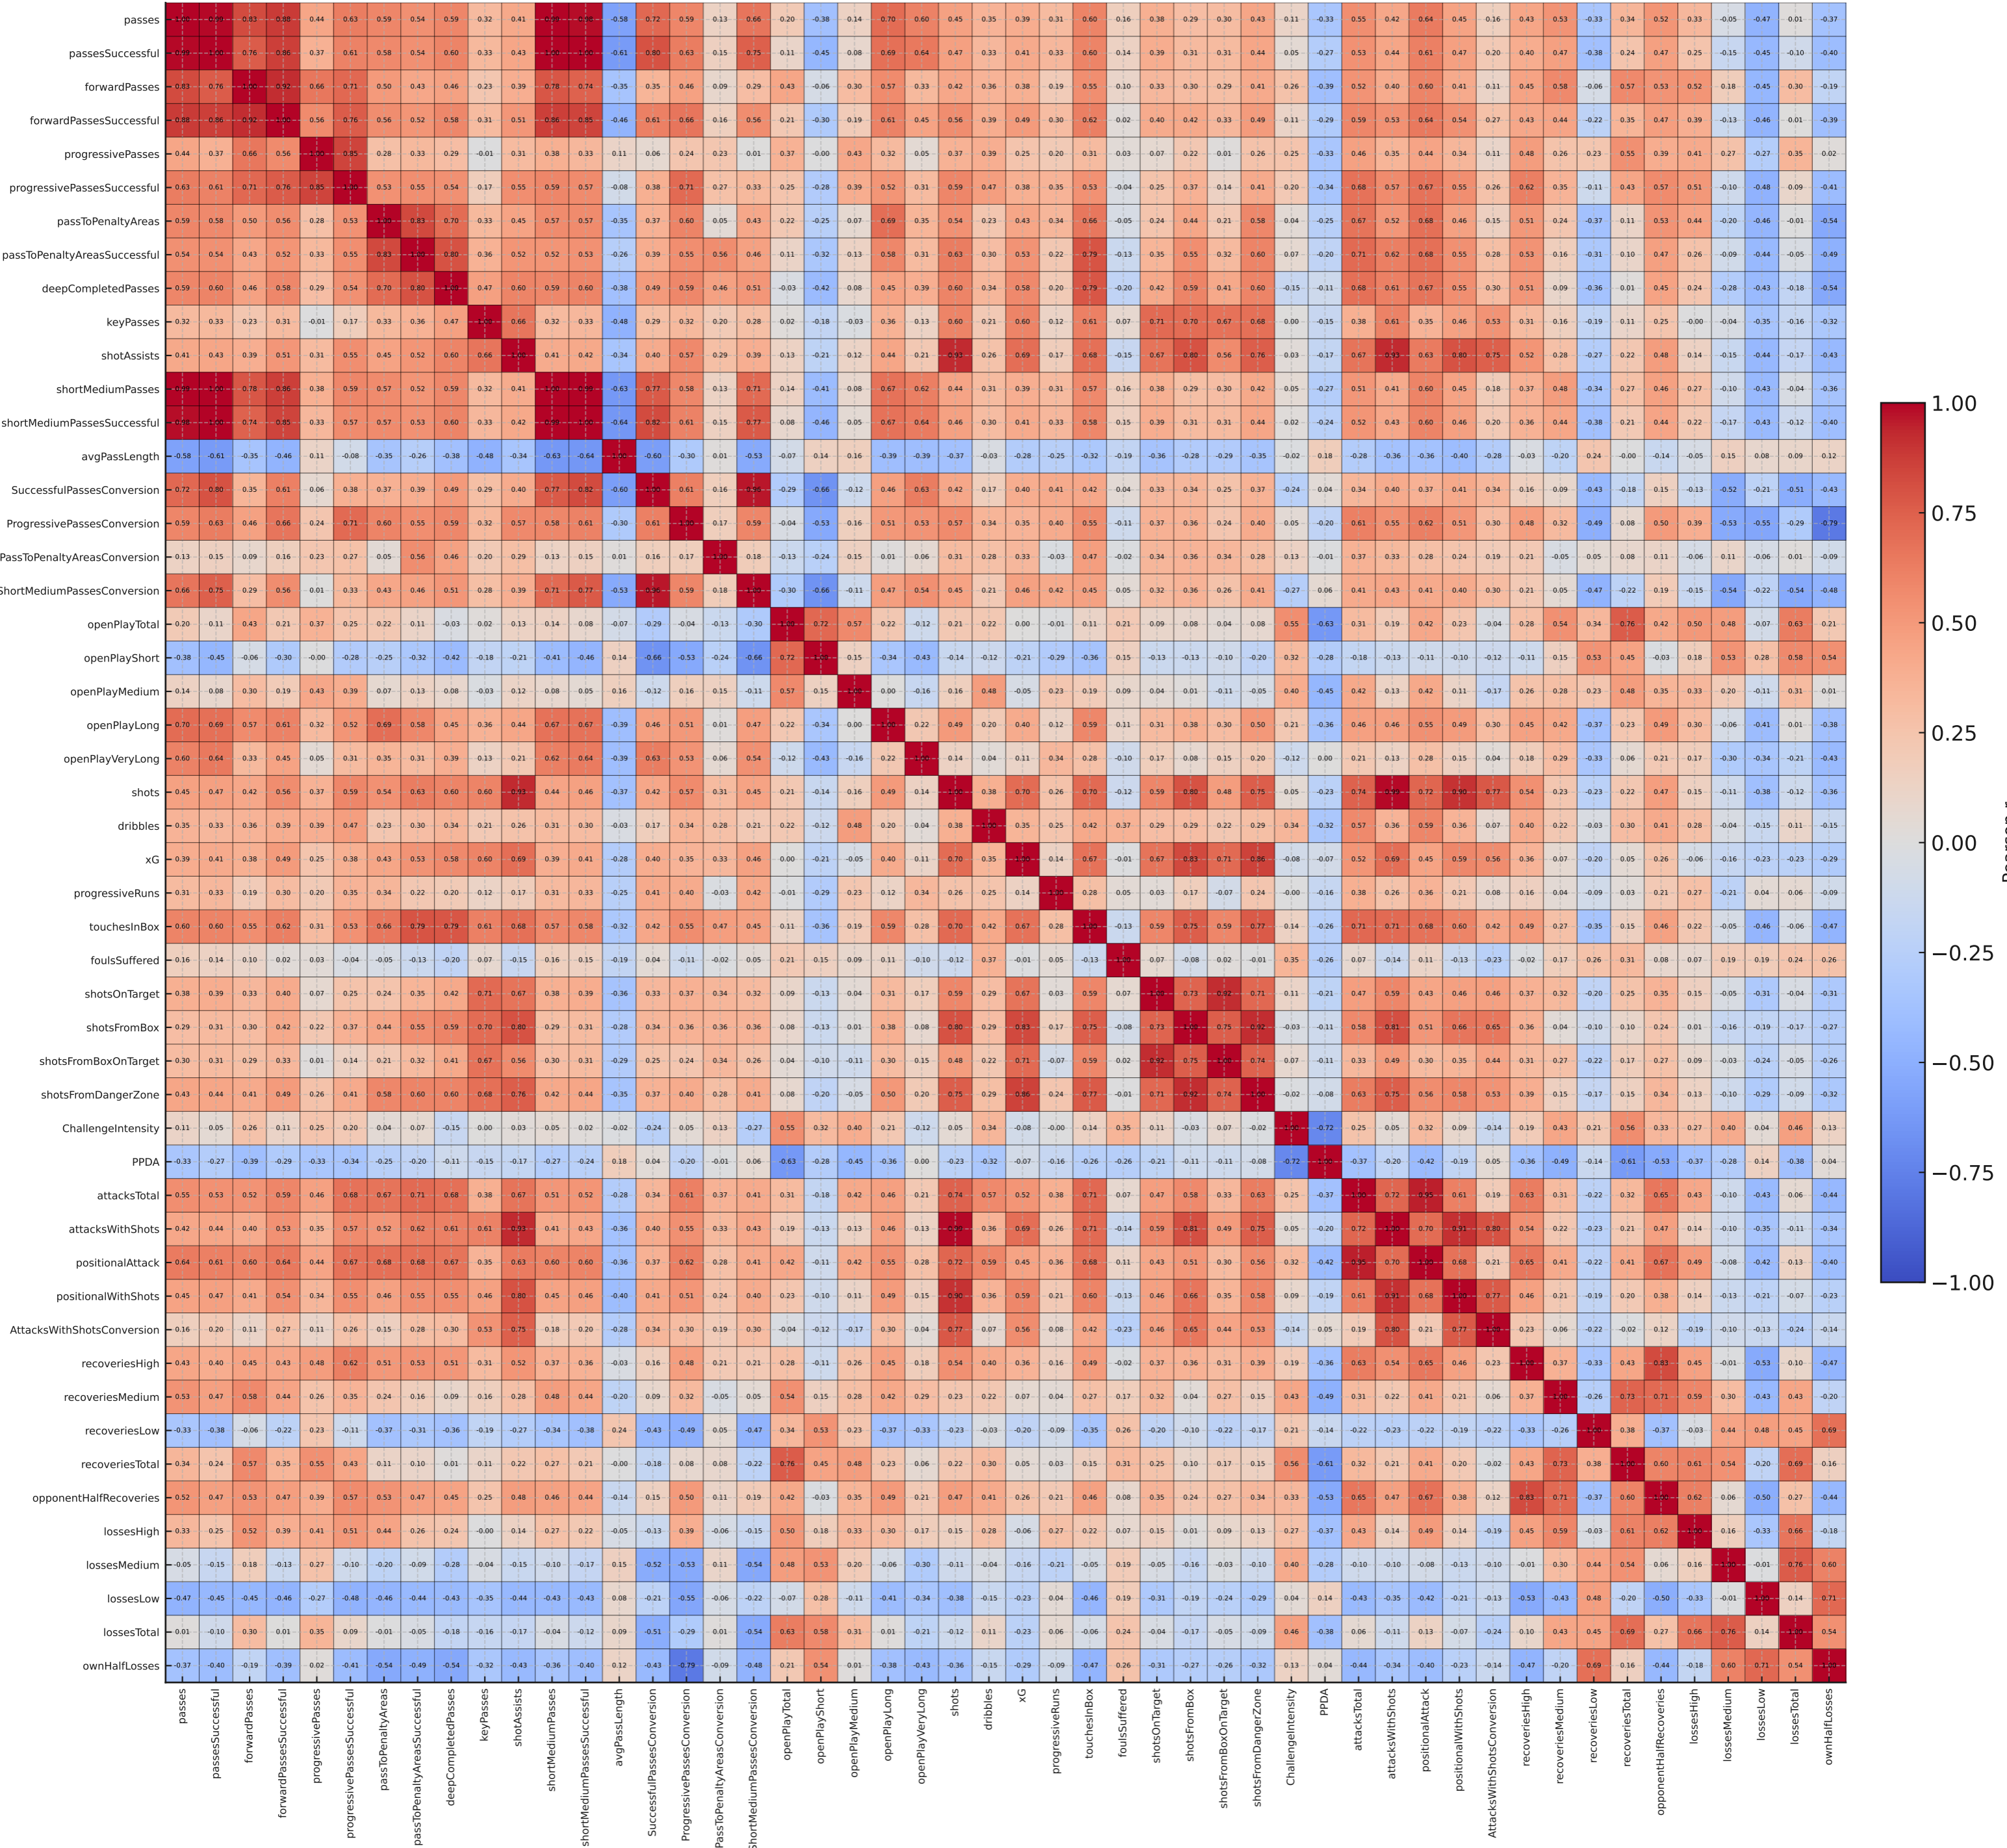

Supplement: Supplementary file 1 [file 76b25050b04667db94fbcdf8.pdf]
